# Supplementary material for: Health-Related Quality of Life, Depressive Symptoms, Anxiety, and Somatization Symptoms in Male and Female Patients with Chronic Tinnitus
Source: MDPI journal article supplement (doi:10.3390/jcm10132798), 2021-06-25
Supplement: s1 [file s1]

Figure S1: Pathway specifications for the present analyses.

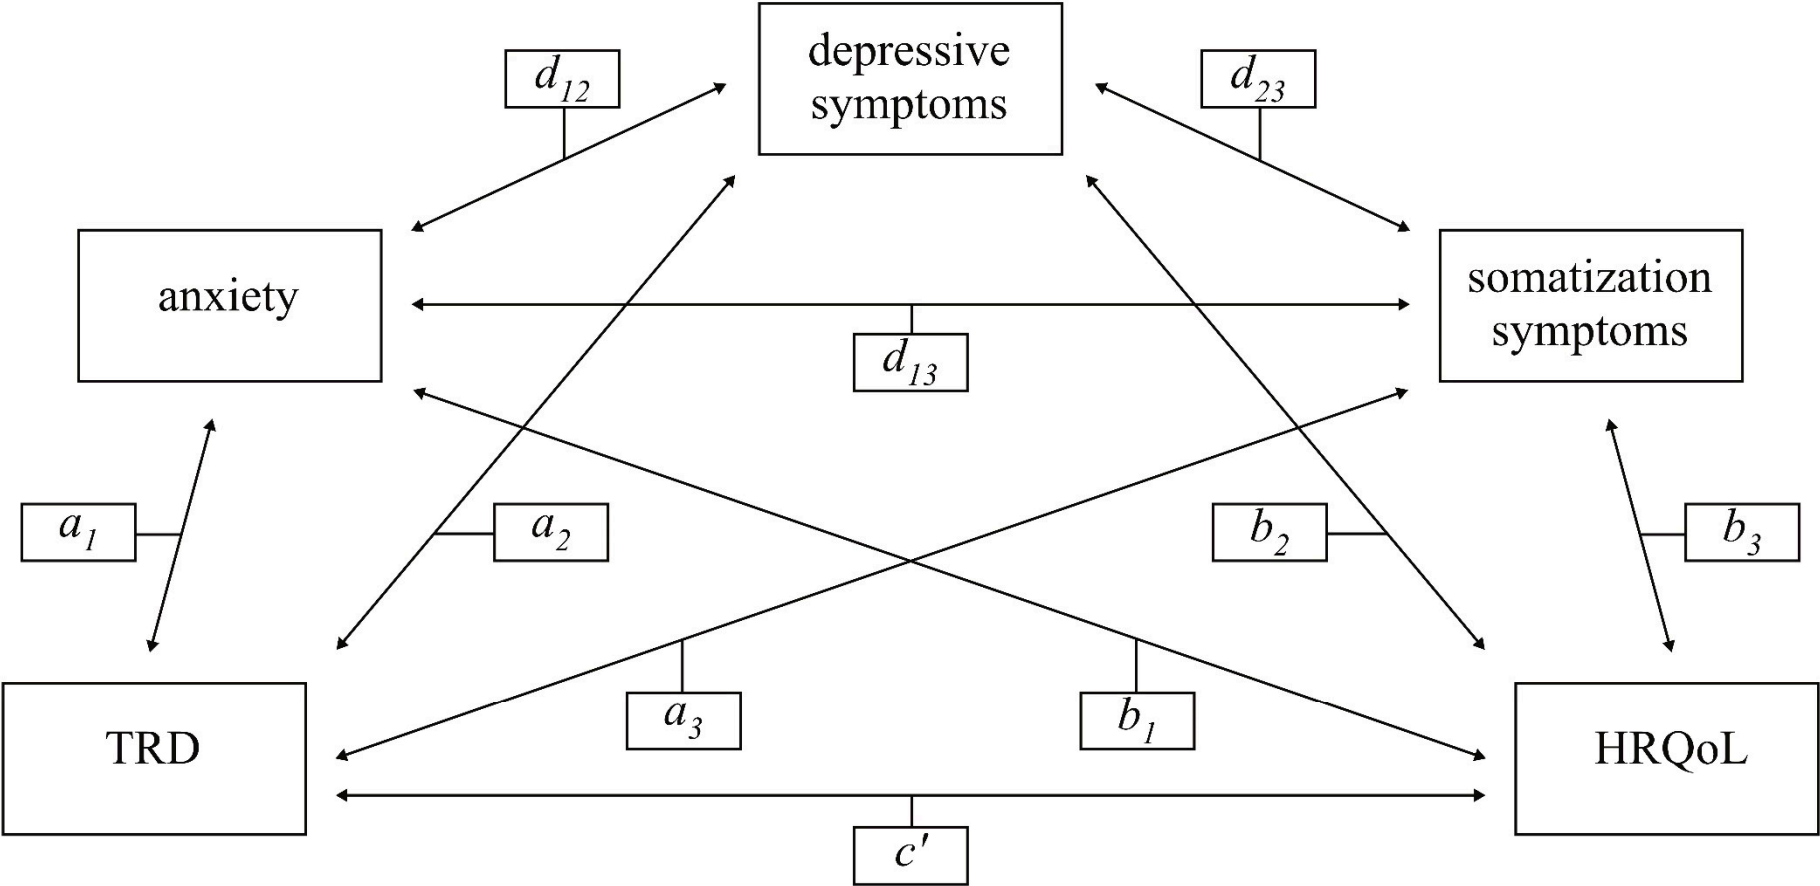

Details and coefficients for the mediation analyses are outlined featuring coefficients  $a$  (effects of the independent variables on the mediators),  $b$  (effect of the mediators on the dependent variable),  $c$  (total effect of the independent variable on the dependent variable),  $c'$  (the direct effect; i.e. the total effect adjusted for  $ab$ ),  $d$  (effects between the mediators) and the total indirect effect that is tested for significance using a *bootstrapping* approach with 95% confidence intervals.

Table S1: Numerical effects for the serial multiple mediation analyses.

|   | $a_1$ | se  | llci | ulci | $a_2$ | se  | llci | ulci | $a_3$ | se  | llci | ulci | $b_1$ | se  | llci  | ulci | $b_2$ | se  | llci  | ulci | $b_3$ | se  | llci  | ulci | $c$  | se  | llci | ulci | $c'$ | se  | llci | ulci | $d_{12}$ | se  | llci | ulci | $d_{13}$ | se  | llci | ulci | $d_{23}$ | se  | llci | ulci |
|---|-------|-----|------|------|-------|-----|------|------|-------|-----|------|------|-------|-----|-------|------|-------|-----|-------|------|-------|-----|-------|------|------|-----|------|------|------|-----|------|------|----------|-----|------|------|----------|-----|------|------|----------|-----|------|------|
| 1 | .13   | .01 | .10  | .16  | .08   | .02 | .05  | .11  | .15   | .03 | .10  | .20  | -.61  | .16 | -.94  | -.29 | -1.07 | .15 | -1.36 | -.78 | -.40  | .10 | -.60  | -.20 | -.36 | .04 | -.44 | -.29 | -.03 | .04 | -.10 | .05  | .58      | .07 | .44  | .72  | .15      | .12 | -.08 | .39  | .28      | .10 | .07  | .48  |
| 2 | .13   | .01 | .10  | .16  | .08   | .02 | .05  | .11  | .15   | .03 | .10  | .20  | -.02  | .15 | -.31  | .27  | -.61  | .13 | -.87  | -.35 | -.96  | .09 | -1.14 | -.78 | -.34 | .04 | -.41 | -.27 | -.04 | .03 | -.11 | .03  | .58      | .07 | .44  | .72  | .15      | .12 | -.08 | .39  | .28      | .10 | .07  | .48  |
| 3 | .16   | .02 | .13  | .19  | .08   | .02 | .04  | .12  | .06   | .03 | -.01 | .13  | -.74  | .19 | -1.12 | -.37 | -.87  | .16 | -1.19 | -.55 | -.43  | .10 | -.63  | -.23 | -.41 | .04 | -.50 | -.33 | -.06 | .04 | -.14 | .02  | .61      | .07 | .46  | .76  | .53      | .15 | .25  | .83  | .18      | .13 | -.07 | .44  |
| 4 | .16   | .02 | .13  | .19  | .08   | .02 | .04  | .12  | .06   | .03 | -.01 | .13  | -.18  | .20 | -.58  | .21  | -.55  | .17 | -.89  | -.21 | -.80  | .10 | -1.00 | -.59 | -.24 | .04 | -.33 | -.16 | .03  | .04 | -.06 | .11  | .61      | .07 | .46  | .76  | .53      | .15 | .25  | .83  | .18      | .13 | -.07 | .44  |

1 = model for Mental HRQoL in Female Patients with Chronic Tinnitus, 2 = model for Physical HRQoL in Female Patients with Chronic Tinnitus, 3 = model for Mental HRQoL in Male Patients with Chronic Tinnitus, 4 = model for Mental HRQoL in Male Patients with Chronic Tinnitus, se = standard error, llci = lower level confidence interval, ulci = upper level confidence interval
